# Supplementary material for: Genomic insights into the pathogenesis of Epstein–Barr virus-associated diffuse large B-cell lymphoma by whole-genome and targeted amplicon sequencing
Source: PubMed Central journal article supplement (PMC8155002; doi:10.1038/s41408-021-00493-5), 2021-05-26
Supplement: 41408_2021_493_MOESM4_ESM.pdf [file 41408_2021_493_MOESM4_ESM.pdf]

# Altered in 6 (75%) of 8 samples.

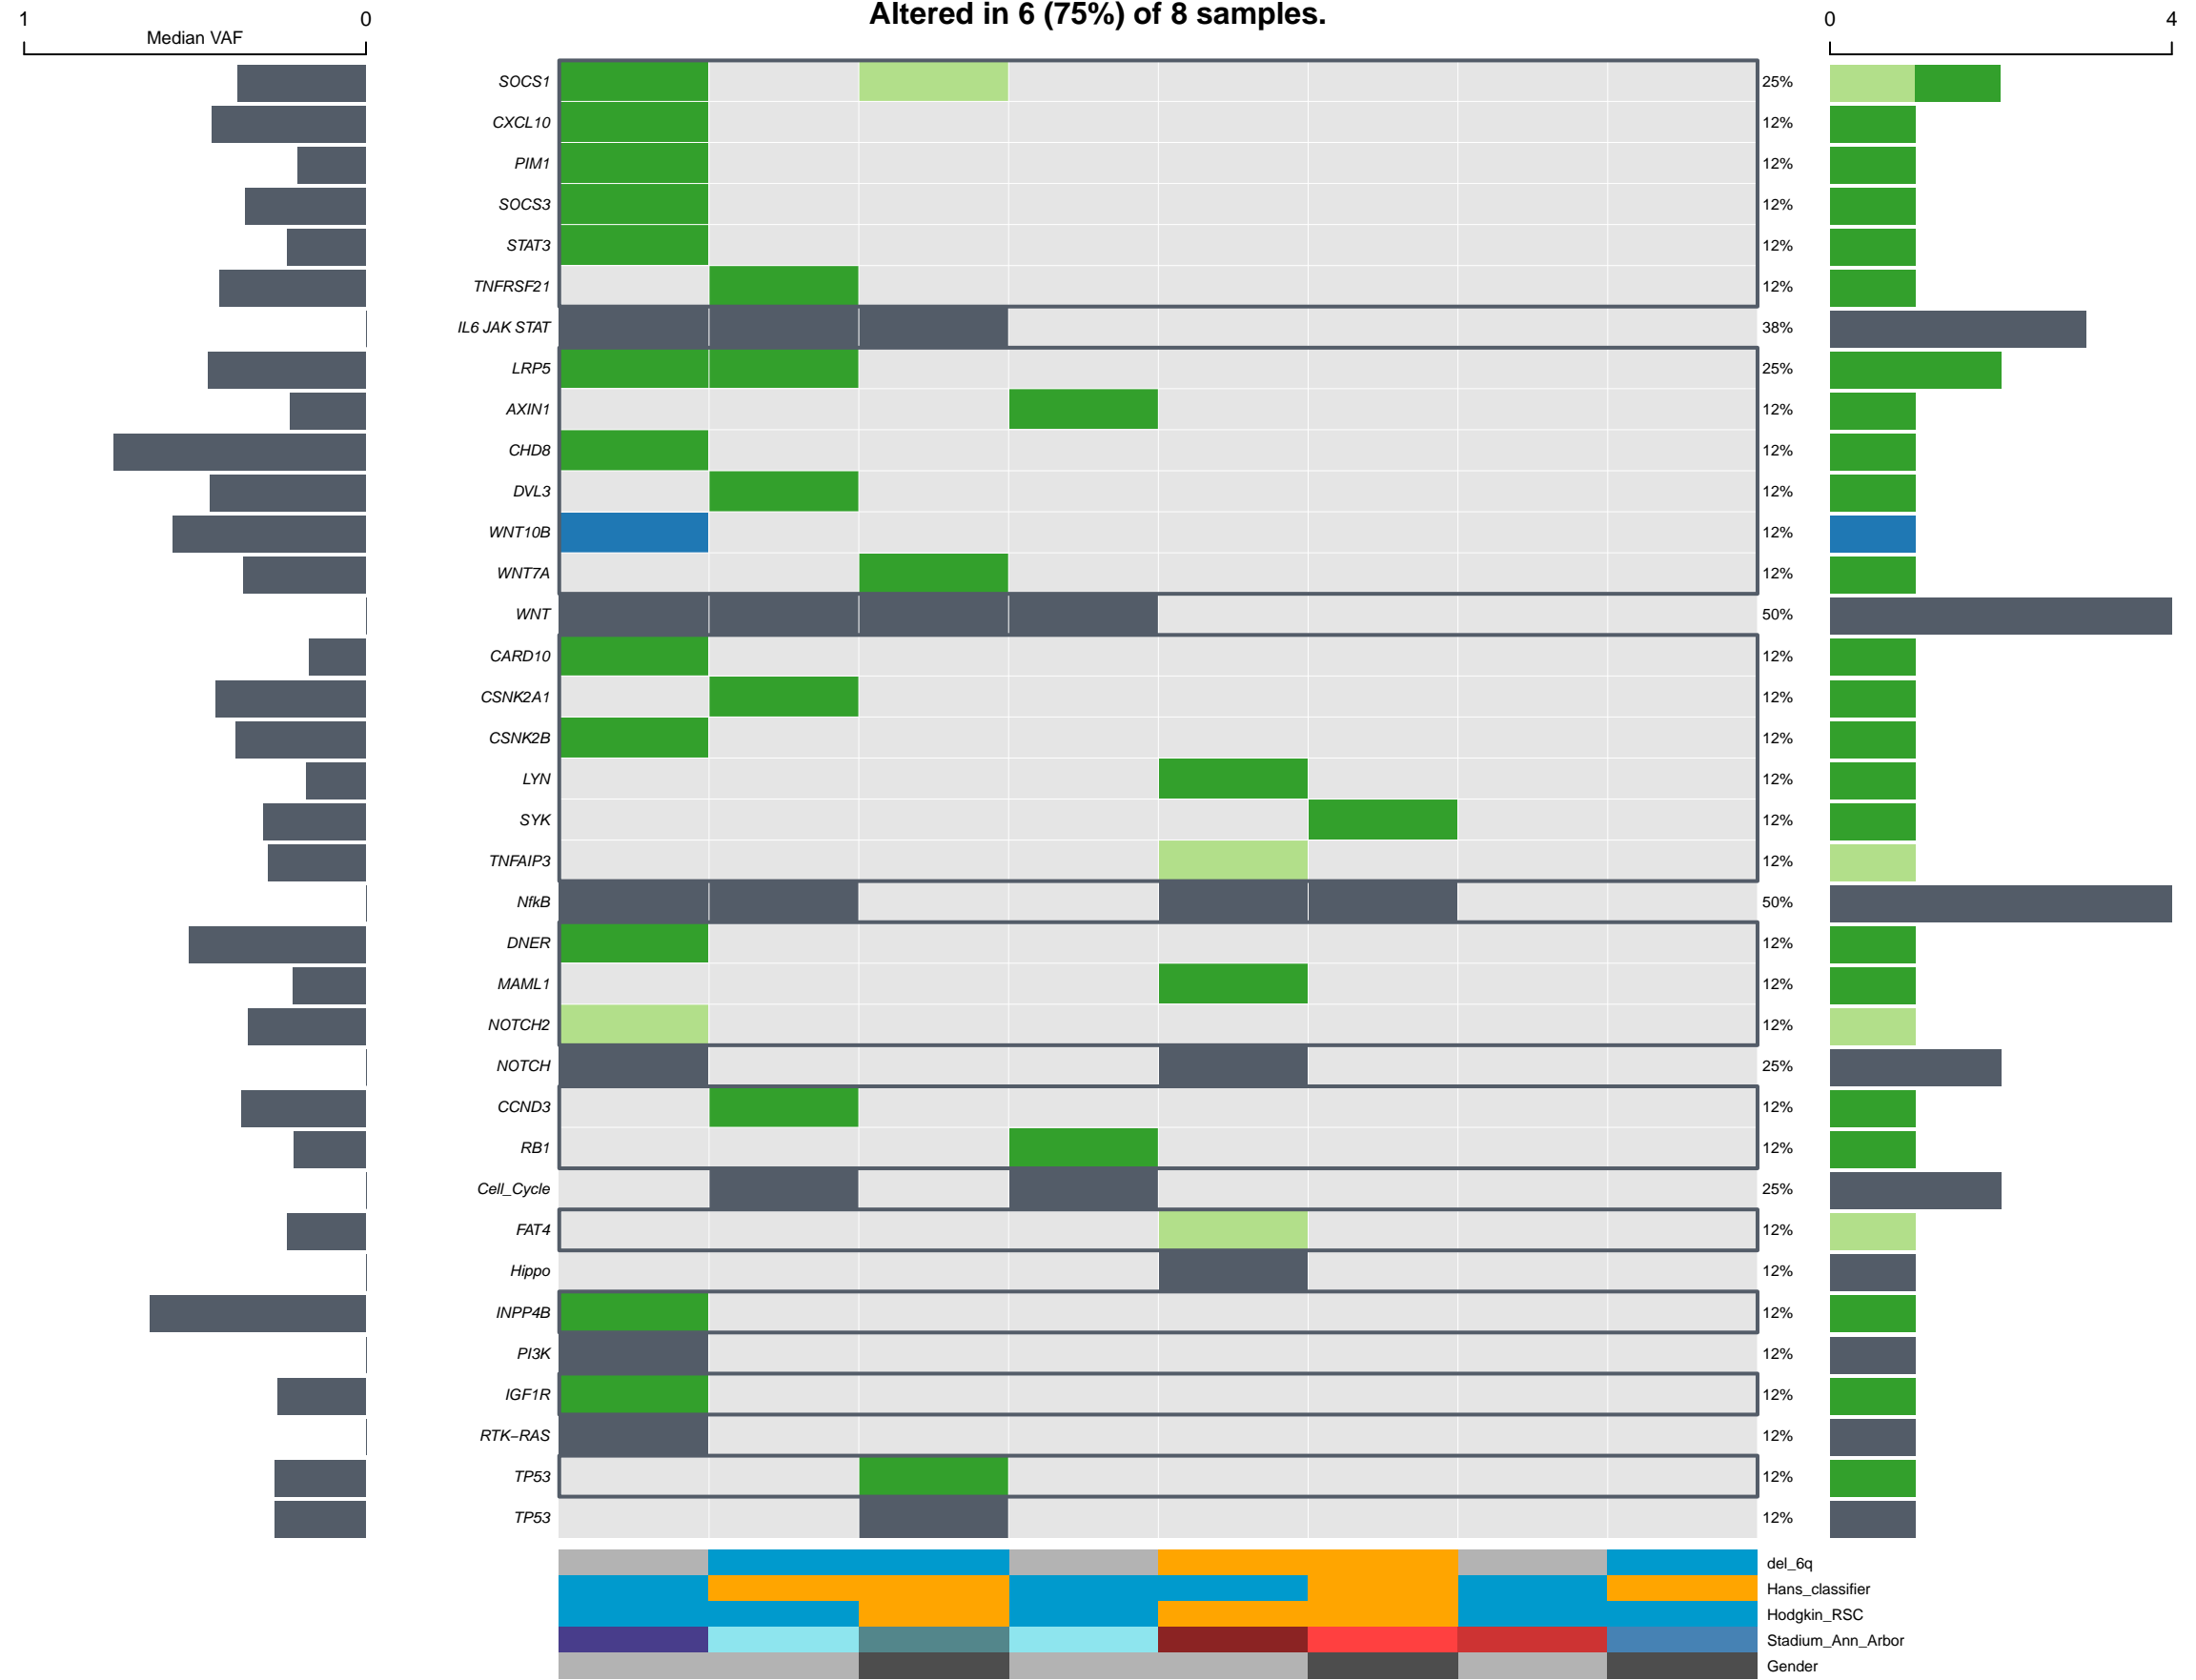

■ Nonsense\_Mutation    ■ Multi\_Hit  
■ Missense\_Mutation    ■ pathway  
■ In\_Frame\_Ins

del\_6q    Hans\_classifier    Hodgkin\_RSC    Stadium\_Ann\_Arbor    Gender  
■ 0    ■ GCB    ■ 0    ■ IA    ■ IIIB    ■ M  
■ 1    ■ non-GCB    ■ 1    ■ IIA    ■ IIIBS    ■ W  
■ NA    ■ IIAE    ■ IVB    ■ IIIA
