# Supplementary material for: Genomic insights into the pathogenesis of Epstein–Barr virus-associated diffuse large B-cell lymphoma by whole-genome and targeted amplicon sequencing
Source: PubMed Central journal article supplement (PMC8155002; doi:10.1038/s41408-021-00493-5), 2021-05-26

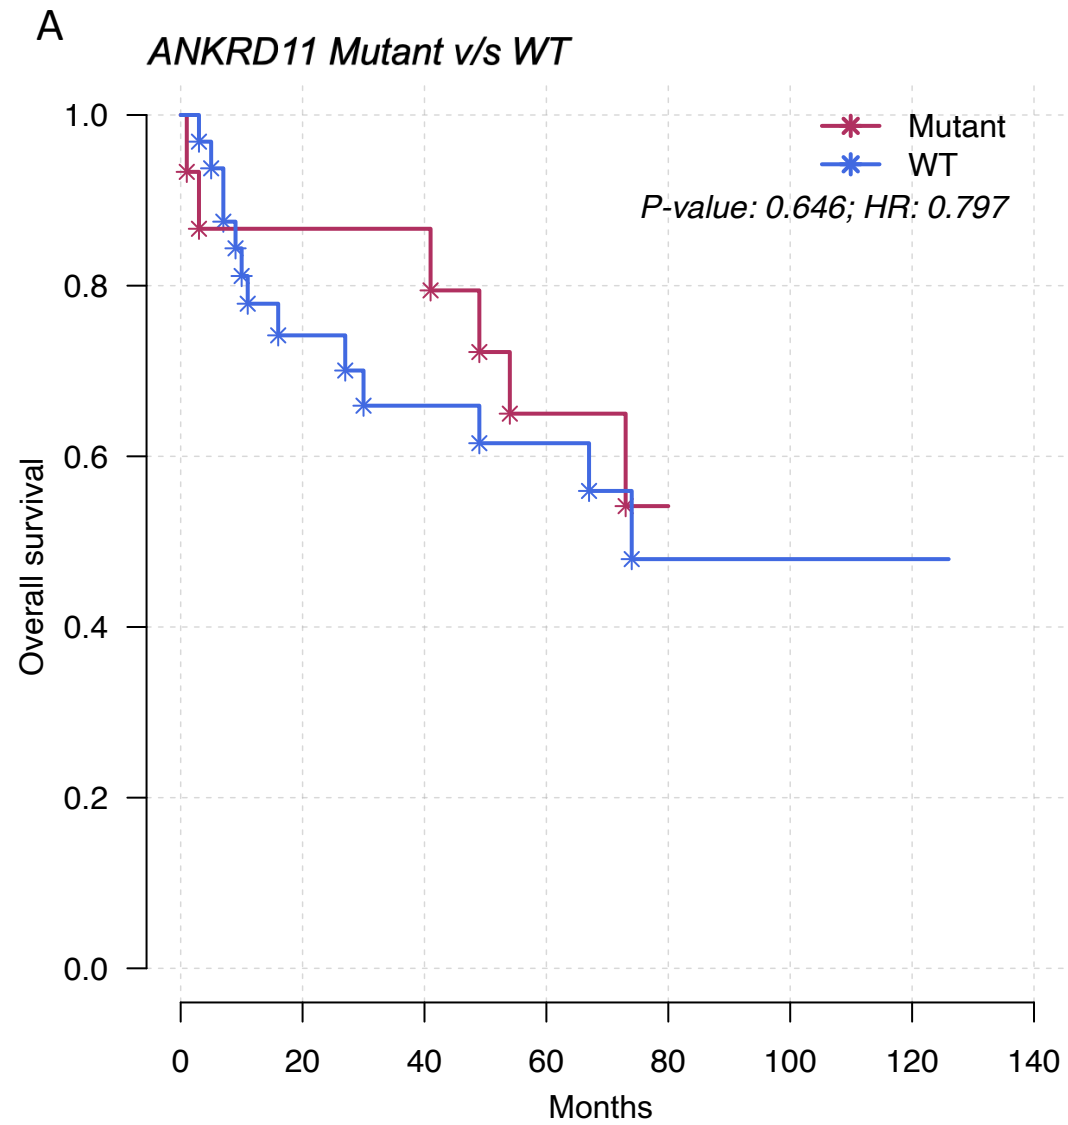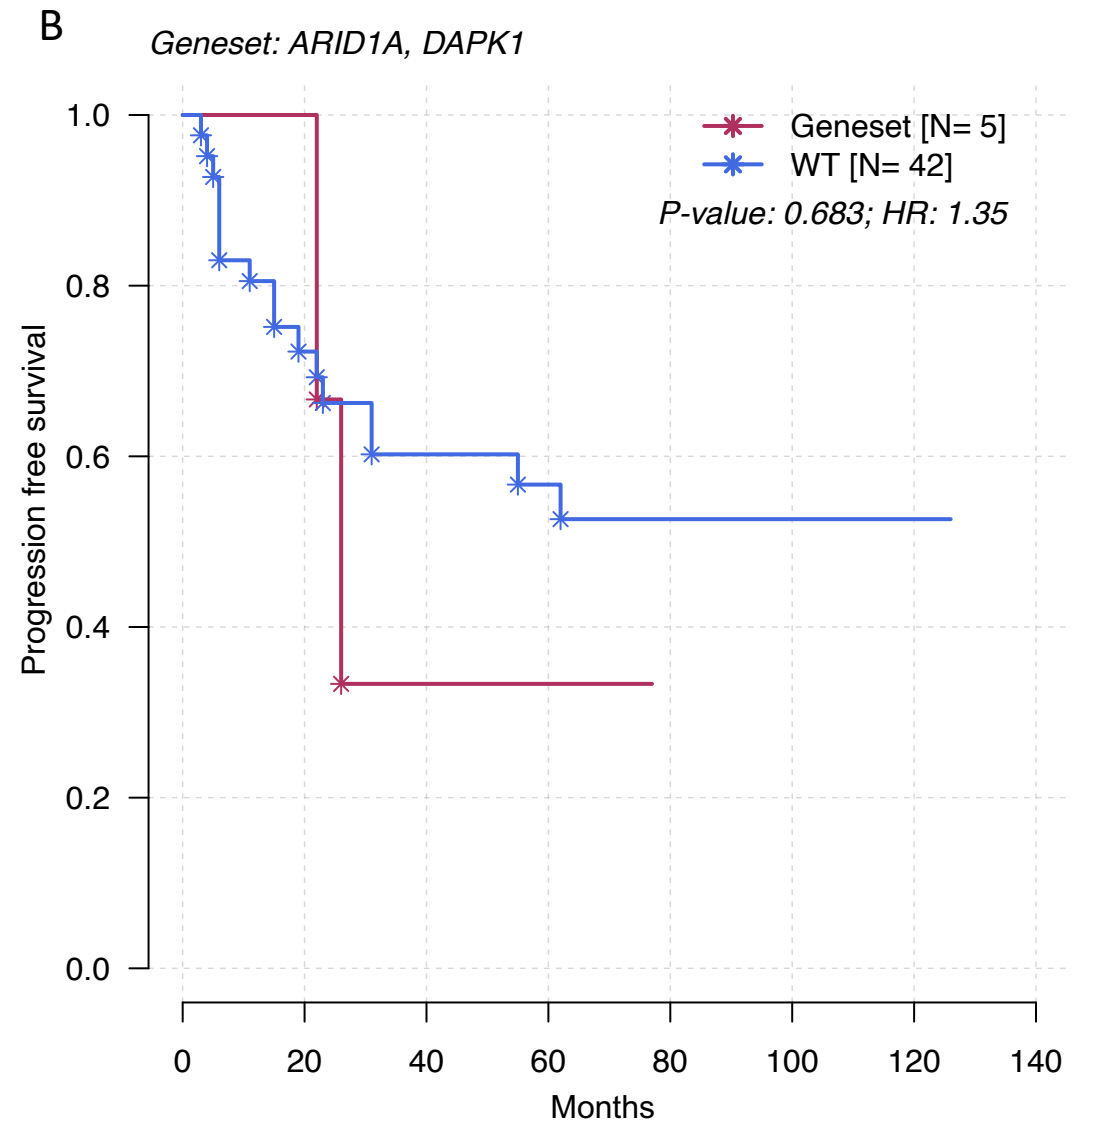

Supplement: 41408_2021_493_MOESM7_ESM.pdf [file 41408_2021_493_MOESM7_ESM.pdf]
